# Supplementary material
Source: PubMed Central journal article supplement (PMC3396476)

## **SUPPORTING INFORMATION**

### **p38 $\gamma$ and p38 $\delta$ kinases regulate TLR4-induced cytokine production by controlling ERK1/2 pathway activation**

Ana Risco, Carlos del Fresno, Agnes Mambol, Dayanira Alsina-Beauchamp, Kirsty MacKenzie, Huei-Ting Yang, Domingo F. Barber, Carmen Morcelle, J. Simon C. Arthur, Steven C. Ley, Carlos Ardavin and Ana Cuenda

#### **SI Materials and Methods**

**Antibodies, reagents and mice.** Anti-p38 $\beta$  antibody was purchased from Zymed (Cambridge Bioscience, UK). Anti-p38 $\gamma$  and -p38 $\delta$  antibodies for immunoprecipitation and immunoblotting were raised and purified as described (1). Antibodies for total and phosphorylated forms of ERK1/2, MKK1 and NF $\kappa$ B1 p105, as well as antibodies to total JNK1/2, total I $\kappa$ B $\alpha$ , TNF $\alpha$  and phosphorylated p38MAPK were from Cell Signaling Technology. Anti-TPL-2, - $\beta$ -actin and -p38 $\alpha$  were from Santa Cruz, anti-phosphorylated JNK1/2 from Biosource, and anti- $\beta$ -tubulin from Zymed (Cambridge Bioscience, UK). All antibodies used in flow cytometry analysis (anti-Gr1 (RB6-8C5), -CD11b (M1/70), -F4/80 (BM8)) were from BD PharMingen). PD184352 was made by custom synthesis (2).

*Escherichia coli* lipopolysaccharide (LPS) and D-galactosamine (D-gal) were purchased from Sigma. Proteasome inhibitor I (PSI) was from Calbiochem (Nottingham, UK).

All DNA constructs and proteins used in this study are described elsewhere (4-6).

Mice lacking p38 $\gamma$ , p38 $\delta$  and p38 $\gamma/\delta$  have been described (6). All strains were backcrossed onto the C57BL/6 strain for at least nine generations. Mice were housed in specific pathogen-free conditions in accordance with European Union regulations; work was approved by the CNB/CSIC ethical review.

**Bone marrow-derived dendritic cells (BMDC) cultured.** BMDC were cultured following a modified protocol (3). In brief, total bone marrow cells were grown on bacteria-grade plastic dishes, in RPMI with 10% FBS and 20 ng/ml GM-CSF (Peprotech; Rocky Hill, NJ) at an initial density of  $0.5 \times 10^6$  cells/ml. Every 3 days, non-adherent cells were removed and replated in the same conditions. After 9 days, the cultures were enriched in dendritic cells by magnetic purification using anti-CD11c-biotin antibody (BD PharMingen; San Diego, CA) and avidin-MACS (Miltenyi; Bergisch Gladbach, Germany). Final purity of the cultures was >95% based on FACS analysis using an anti-CD11c-APC antibody (eBioscience, Hatfield, UK). These dendritic cell cultures were seeded at a constant density of  $0.25 \times 10^6$  cells/ml in non-tissue-culture treated p24 plates in RPMI/10% FBS.

**Immunoprecipitation and immunoblotting.** BMDM extracts (15 mg) were incubated with 2  $\mu$ g anti-p38 $\gamma$  or -p38 $\delta$  antibody coupled to protein G-Sepharose. After incubation (2 h, 4°C), captured proteins were centrifuged (13,000 x g), supernatants discarded and the beads washed twice in buffer A (see Methods) containing 0.5 M NaCl, then twice in buffer A alone. For immunoblotting, protein samples were resolved in SDS-PAGE and transferred to nitrocellulose membranes, which were blocked (30 min) in 50 mM Tris/HCl (pH 7.5), 0.15 M NaCl, 0.05% (v/v) Tween (TBST buffer) containing 10% (w/v) non-fat dry milk, then incubated in TBST buffer with 10% (w/v) non-fat dry milk and 0.5-1  $\mu$ g/ml antibody (2 h, room temperature or overnight, 4°C). Protein was detected using horseradish peroxidase-conjugated secondary antibodies and the enhanced chemiluminescence reagent (Amersham Pharmacia Biotech).

**Cytokine quantification and Flow cytometry.** For BMDC cytokine measurements, we used OptEIA Set ELISA kits for TNF $\alpha$ , IL1-1 $\beta$ , IL-6, IL-10 and IL-12p70 (BD Biosciences). IFN $\beta$  levels were detected using a Verikine IFN-Beta ELISA kit (PBL

Interferon Source). Cytokine concentrations in BMDM supernatants and mouse serum samples were measured using the Luminex-based MilliPlex Mouse cytokine/chemokine immunoassay and the Luminex-based Bio-Plex Mouse Grp I Cytokine 23-Plex Panel (Bio-Rad). Antibodies used were PE-conjugated, and cells were stained at saturating concentrations (4°C). Cells were analyzed on an EPICS XL with System II software (Beckman Coulter).

**Gene expression analysis.** cDNA for real-time quantitative PCR (qPCR) was generated from 1 µg total RNA using the High Capacity cDNA Reverse Transcription Kit (Applied Biosystems) in a 10 µl final reaction volume. Real-time qPCR reactions were performed in triplicate using 3 µl/well of two serial dilutions (1/50, 1/500) of each cDNA, 0.3 µM of each primer, and 1x Fluocycle SYBR Green Mix for real-time qPCR (Genycell-EuroClone) in a volume of 8 µl in MicroAmp Optical 384-well plates (Applied Biosystems). PCR reactions were carried out in an ABI PRISM 7900HT (Applied Biosystems) and SDS v2.2 software was used to analyze results by the Comparative Ct Method ( $\Delta\Delta C_t$ ). X-fold change in mRNA expression was quantified relative to unstimulated wild-type cells, and 18S or GAPDH RNA was used as loading control.

**Primer sequences used for quantitative real-time PCR.** *p38 $\alpha$* , forward 5'-AACCAGACAGTGGATATTTGGTC and reverse 5'-TGAGCTTCAACTGATCAATATGGT; *p38 $\beta$* , forward 5'-GTCCTGAAGTTCTGGCAAAGA and reverse 5'-CACTGATGAGGTCCTTCTGG; *p38 $\gamma$* , forward 5'-ACCTGATGAGTCTCTGGACGA and reverse 5'-CCAGATCAGTGCCCATGAAT; *p38 $\delta$* , forward 5'-GGACCCTGAGGAGGAGACA and reverse 5'-GTTTGAGATCTCTTTGTAGATGTGTTG; *TPL-2*, forward 5'-CAACTTCCTGAGAACATTGCTG and reverse 5'-CGCTGTCTCCTGAGCACTT; *IL-6*, forward 5'-GCTACCAAACCTGGATATAATCAGG and reverse 5'-

CAGGTAGCTATGGTACTCCAGAA; *IL10*, forward 5'-AGGCGCTGTCATCGATT-TCTC and reverse 5'-TGGCCTTGTAGACACCTTGGTC; *IL12(p35)*, forward 5'-AAGAACGAGAGTTGCCTGGCT and reverse 5'-TTGATGGCCTGGAACTCTGTC; *IL12(p40)*, forward 5'-GGAAGCACGGCAGCAGAATA and reverse 5'-AACTTGA-GGGAGAAGTAGGAATGG; *IL1 $\beta$* , forward 5'-TTGACGGACCCCAAAGAT and reverse 5'-GAAGCTGGATGCTCTCATCTG; *TNF $\alpha$* , forward 5'-CTGTAGCCCAC-GTCGTAGC and reverse 5'-TTGAGATCCATGCCGTTG; *IFN $\beta$* , forward 5'-GGAA-AAGCAAGAGGAAAGATTGAC and reverse 5'-CCACCATCCAGGCGTAGC; *ABIN-2*, forward 5'-GACGCACTTCTGGATCAGGT and reverse 5'-CGCTCCGTAA-GTCTTTCAACTT; *18S*, forward 5'-CGCGGTTCTATTTTGTGGT and reverse 5'-AGTCGGCATCGTTTATGGTC; *GAPDH*, forward 5'-GCCTTCCGTGTTCTACCC and reverse 5'-TGCCTGCTTCACCACCTTC.

**Statistical analysis.** Data were expressed as mean  $\pm$  SD. Statistical analysis was performed with Student's t test for two samples. Kaplan-Meier analysis was used for survival analyses. Values of  $p < 0.05$  were considered to be significant.

## SI References

1. Cuenda A, Cohen P, Buee-Scherrer V, Goedert M (1997) Activation of stress-activated protein kinase-3 (SAPK3) by cytokines and cellular stresses is mediated via SAPKK3 (MKK6); comparison of the specificities of SAPK3 and SAPK2 (RK/p38). *EMBO J* 16, 295-305.
2. Kuma Y, et al. (2005) BIRB796 inhibits all p38 MAPK isoforms in vitro and in vivo. *J Biol Chem* 280, 19472-19479.

3. Inaba K, *et al.* (1992) Generation of large numbers of dendritic cells from mouse bone marrow cultures supplemented with granulocyte/macrophage colony-stimulating factor. *J Exp Med* 176(6):1693-1702.
4. Cerezo-Guisado MI, *et al.* (2011) Evidence of p38gamma and p38delta involvement in cell transformation processes. *Carcinogenesis* 32(7):1093-1099.
5. Papoutsopoulou S, *et al.* (2006) ABIN-2 is required for optimal activation of Erk MAP kinase in innate immune responses. *Nat Immunol* 7(6):606-615.
6. Sabio G, *et al.* (2005) p38gamma regulates the localisation of SAP97 in the cytoskeleton by modulating its interaction with GKAP. *Embo J* 24(6):1134-1145.

### SI Figure Legends

**Figure S1.** Expression of p38MAPK isoforms in BMDM. (A) Cell extracts from WT, p38 $\gamma$ <sup>-/-</sup>, p38 $\delta$ <sup>-/-</sup> and p38 $\gamma/\delta$ <sup>-/-</sup> BMDM were examined by immunoblot using anti-p38 $\alpha$  and -p38 $\beta$  antibodies. Duplicate lanes are shown. (B) Endogenous p38 $\gamma$  or p38 $\delta$  were immunoprecipitated from 15 mg of WT BMDM extracts and p38 protein in the pellet was immunoblotted with anti-p38 $\gamma$  or -p38 $\delta$  antibodies. Total tubulin protein was used as a loading control. Representative blots are shown from three independent experiments. The p38 $\alpha$  isoform was most abundant, followed by p38 $\beta$ , p38 $\delta$ , and finally p38 $\gamma$ , which was expressed at very low levels (see also Table S1). Moreover, the level of p38 $\beta$  was approximately two-fold higher in p38 $\gamma$ <sup>-/-</sup> and p38 $\gamma/\delta$ <sup>-/-</sup> macrophages than in WT or p38 $\delta$ <sup>-/-</sup> cells (see also Table S1), indicating that p38 $\beta$  expression might be negatively regulated by p38 $\gamma$ . In BMDC, p38 $\delta$  was the most abundant isoform after p38 $\alpha$ .

**Figure S2.** Lack of p38 $\gamma$  and p38 $\delta$  do not affect *in vitro* BMDM or BMDC development. (A) BMDM or (B) BMDC from WT and p38 $\gamma/\delta^{-/-}$  mice were stained with anti-F4/80 or -CD11c antibody, respectively, and analyzed by flow cytometry. Results are representative plots ( $n \geq 3$ ). White histograms show isotype control.

**Figure S3.** BMDM cytokine production from p38 $\gamma$  and p38 $\delta$ -deficient mice in response to LPS. (A) BMDM from WT (black bars), p38 $\gamma^{-/-}$  (dark grey) or p38 $\delta^{-/-}$  (light grey) mice were exposed to LPS (100 ng/ml) for the indicated times and culture supernatants harvested for luminex cytokine analysis of TNF $\alpha$ , IL-1 $\beta$ , IL-10, IL-6 and IL-12(p70). Values show mean  $\pm$  SD for one representative experiment of three performed in duplicate. (B) Quantitative PCR of TNF $\alpha$ , IL-1 $\beta$ , IL-10, IL-6, IL-12(p35) and IL-12(p40) mRNA in total RNA from WT (black bars), p38 $\gamma^{-/-}$  (dark grey) or p38 $\delta^{-/-}$  (light grey) BMDM stimulated with LPS (100 ng/ml) for the indicated times. Results were normalized to 18S RNA expression and x-fold induction was calculated relative to WT expression at 0 h. Data show mean  $\pm$  SD from one representative experiment of two in triplicate, with similar results. \*  $p \leq 0.05$ , \*\*  $p \leq 0.01$  and \*\*\*  $p \leq 0.001$  relative to WT BMDM exposed to LPS, in each time.

**Figure S4.** p38 $\gamma/\delta$  deficiency in BMDC affects cytokine production in response to LPS. (A) BMDC from WT (black bars) or p38 $\gamma/\delta^{-/-}$  mice (white) were exposed to LPS (100 ng/ml) for the indicated times and culture supernatants harvested for ELISA of TNF $\alpha$ , IL-1 $\beta$ , IL-10, IL-6 and IL-12(p70). Data are mean  $\pm$  SD of one representative experiment of three performed. (B) Quantitative PCR of TNF $\alpha$ , IL-1 $\beta$ , IL-10, IL-6, IL-12(p35) and IL-12(p40) mRNA in total RNA from WT (black bars) or p38 $\gamma/\delta^{-/-}$  (white)

BMDC stimulated with LPS (100 ng/ml) as indicated. Results were normalized to 18S RNA expression and x-fold induction was calculated relative to WT expression at 0 h. Data show mean  $\pm$  SD of one representative experiment of two with similar results. \*  $p \leq 0.05$ , \*\*  $p \leq 0.01$  and \*\*\*  $p \leq 0.001$  relative to WT BMDM exposed to LPS, in each time.

**Figure S5.** Role of IL-10 in LPS-induced cytokine production. (A, B) BMDM from WT (black bars) or p38 $\gamma$ / $\delta$ <sup>-/-</sup> mice (white) were exposed to LPS (100 ng/ml) alone or in the presence of neutralizing antibody to IL-10 (Anti-IL10) or an isotype control antibody (IgG) (both at 1  $\mu$ g/ml, 12 h); culture supernatants were harvested for luminex cytokine analysis of (A) IL-10 and (B) TNF $\alpha$ . Data are mean  $\pm$  SD of one representative experiment of two with similar results. Real-time qPCR analysis of (A) *IL-10* and (B) *Tnf $\alpha$*  mRNA in total RNA from WT (black bars) or p38 $\gamma$ / $\delta$ <sup>-/-</sup> (white) BMDM stimulated as before for the indicated times. Results show mean  $\pm$  SD of triplicate wells normalized to GAPDH mRNA. (\*)  $p \leq 0.05$ , (\*\*)  $p \leq 0.01$  and (\*\*\*)  $p \leq 0.001$  relative to WT BMDM in each experimental condition.

**Figure S6.** Deletion of p38 $\gamma$  and p38 $\delta$  blocks LPS activation of ERK1/2 in BMDC. BMDC from WT or p38 $\gamma$ / $\delta$ <sup>-/-</sup> mice were unstimulated or stimulated with 100 ng/ml LPS for the indicated times and cell lysates immunoblotted with anti-P-ERK1/2, -ERK1/2, -I $\kappa$ B $\alpha$ , -P-p38 $\alpha$ , -P-JNK1/2, anti-JNK1/2, anti-TPL2, anti-ABIN2 and - $\beta$ -actin (loading control). Representative blots are shown from two independent experiments.

**Figure S7.** Deletion of p38 $\gamma$  and p38 $\delta$  decreases TPL-2 protein levels in BMDM. BMDM from WT, p38 $\gamma$ <sup>-/-</sup>, p38 $\delta$ <sup>-/-</sup> or p38 $\gamma$ / $\delta$ <sup>-/-</sup> mice were stimulated with 100 ng/ml LPS

for the times indicated. Following cell lysis and SDS-PAGE, immunoblotting was carried with antibodies to total TPL-2 protein and tubulin (loading control). TPL-2 activation after LPS treatment is followed by degradation of its “long” form by the proteasome.

**Figure S8.** ERK1/2 pathway regulates cytokine production. WT BMDM were preincubated with PD184352 (2  $\mu$ M) or DMSO (vehicle) and then cells were stimulated with 100 ng/ml LPS for (A) 6 h, and TNF $\alpha$ , IL-1 $\beta$ , IL-12(p70), IL-10 and IL-6 levels were measured in a Luminex-based assay; or (B) for 1 or 6 h and total RNA was isolated. TNF $\alpha$ , IL-1 $\beta$ , IL-12(p35), IL-10 and IL-6 mRNA expression analyzed by qPCR. Results are normalized for 18S RNA quantities. Data show mean  $\pm$  SEM of three independent stimulations.

**Figure S9.** Bone marrow-derived macrophages from TPL-2-deficient mice show altered cytokine production in response to LPS. BMDM from WT (black bars) or TPL-2<sup>-/-</sup> (white) mice were exposed to LPS (10 ng/ml) for the indicated times and total RNA was isolated. TNF $\alpha$ , IL-1 $\beta$ , IL-10, IL-6, IL-12(p35) and IL-12(p40) mRNA expression was analyzed by qPCR. Target gene mRNA levels were normalized against *Hprt* mRNA levels. Each data point represents the average  $\pm$  SEM for three independent macrophage pools. Experiments are representative of three independent experiments with consistent results. \*  $p \leq 0.05$ , \*\*  $p \leq 0.01$  and \*\*\*  $p \leq 0.001$  relative to WT BMDM exposed to LPS, in each time.

**Figure S10.** Effect of p38 $\gamma$  and p38 $\delta$  deletion on cytokine production in response to LPS/D-Gal challenge. Mice received injections of LPS (50 mg/kg) and D-Gal (1 g/kg). Serum from WT (black bars), p38 $\gamma$ <sup>-/-</sup> (dark grey), p38 $\delta$ <sup>-/-</sup> (light grey) or p38 $\gamma/\delta$ <sup>-/-</sup> (white)



mice was collected 2 h after LPS and D-Gal challenge and cytokines measured in a Multiplex cytokine assay. Data show mean  $\pm$  SD ( $n = 4-6$  mice/group). (\*)  $p \leq 0.05$  relative to WT mouse serum.

**Table S1.** Comparative expression pattern of p38MAPKs mRNA in bone marrow derived macrophages (BMDM) and derived dendritic cells (BMDC)<sup>a</sup>

|             |                         | <i>p38 family member mRNA<sup>b</sup></i> |                  |                  |                  |
|-------------|-------------------------|-------------------------------------------|------------------|------------------|------------------|
|             |                         | $\alpha$                                  | $\beta$          | $\gamma$         | $\delta$         |
| <b>BMDM</b> | Wild type               | 1.000 ± 0.104                             | 0.100 ± 0.005    | 0.003 ± 0.0005   | 0.045 ± 0.0071   |
|             | p38 $\gamma$ -/-        | 1.077 ± 0.092                             | 0.204 ± 0.0005   | 0                | 0.045 ± 0.0041   |
|             | p38 $\delta$ -/-        | 0.661 ± 0.229                             | 0.067 ± 0.033    | 0.0012 ± 0.0001  | 0                |
|             | p38 $\gamma/\delta$ -/- | 0.930 ± 0.106                             | 0.173 ± 0.000    | 0                | 0                |
| <b>BMDC</b> | Wild type               | 1.0000 ± 0.17203                          | 0.0002 ± 0.00004 | 0.0021 ± 0.00030 | 0.0520 ± 0.02021 |

a. RT-PCR analysis was performed using p38MAPK isoforms specific primers as described in Methods.

b. Values represent the mean ± SD of determinations using RNA from three to four independent cell cultures. Values are relative to p38 $\alpha$  mRNA in each cell type as reference (fold value = 1).

Figure S1 (Risco et al)

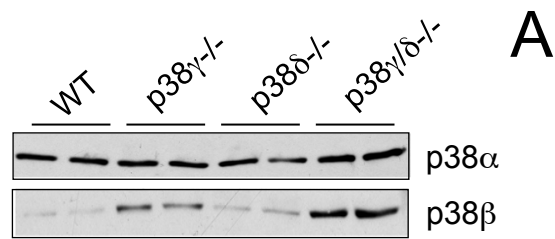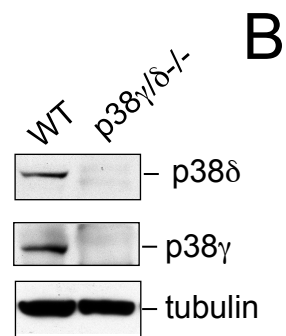

Figure S2 (Risco et al)

A

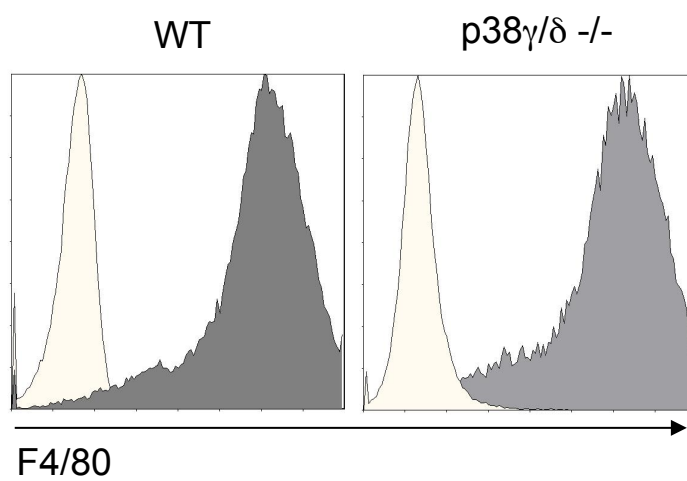

B

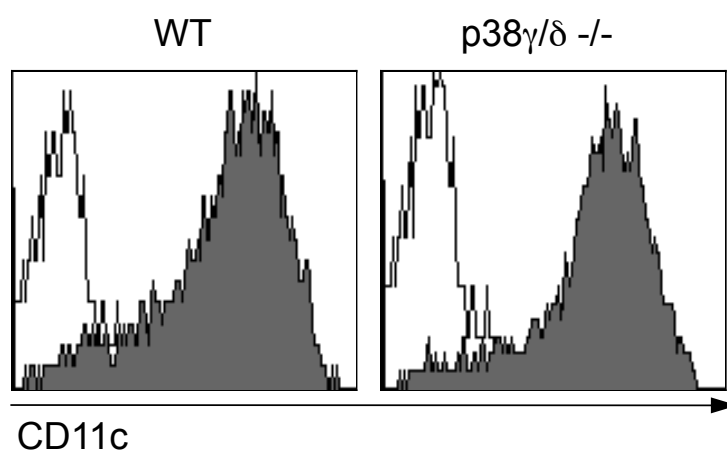

Figure S3 (Risco et al)

A

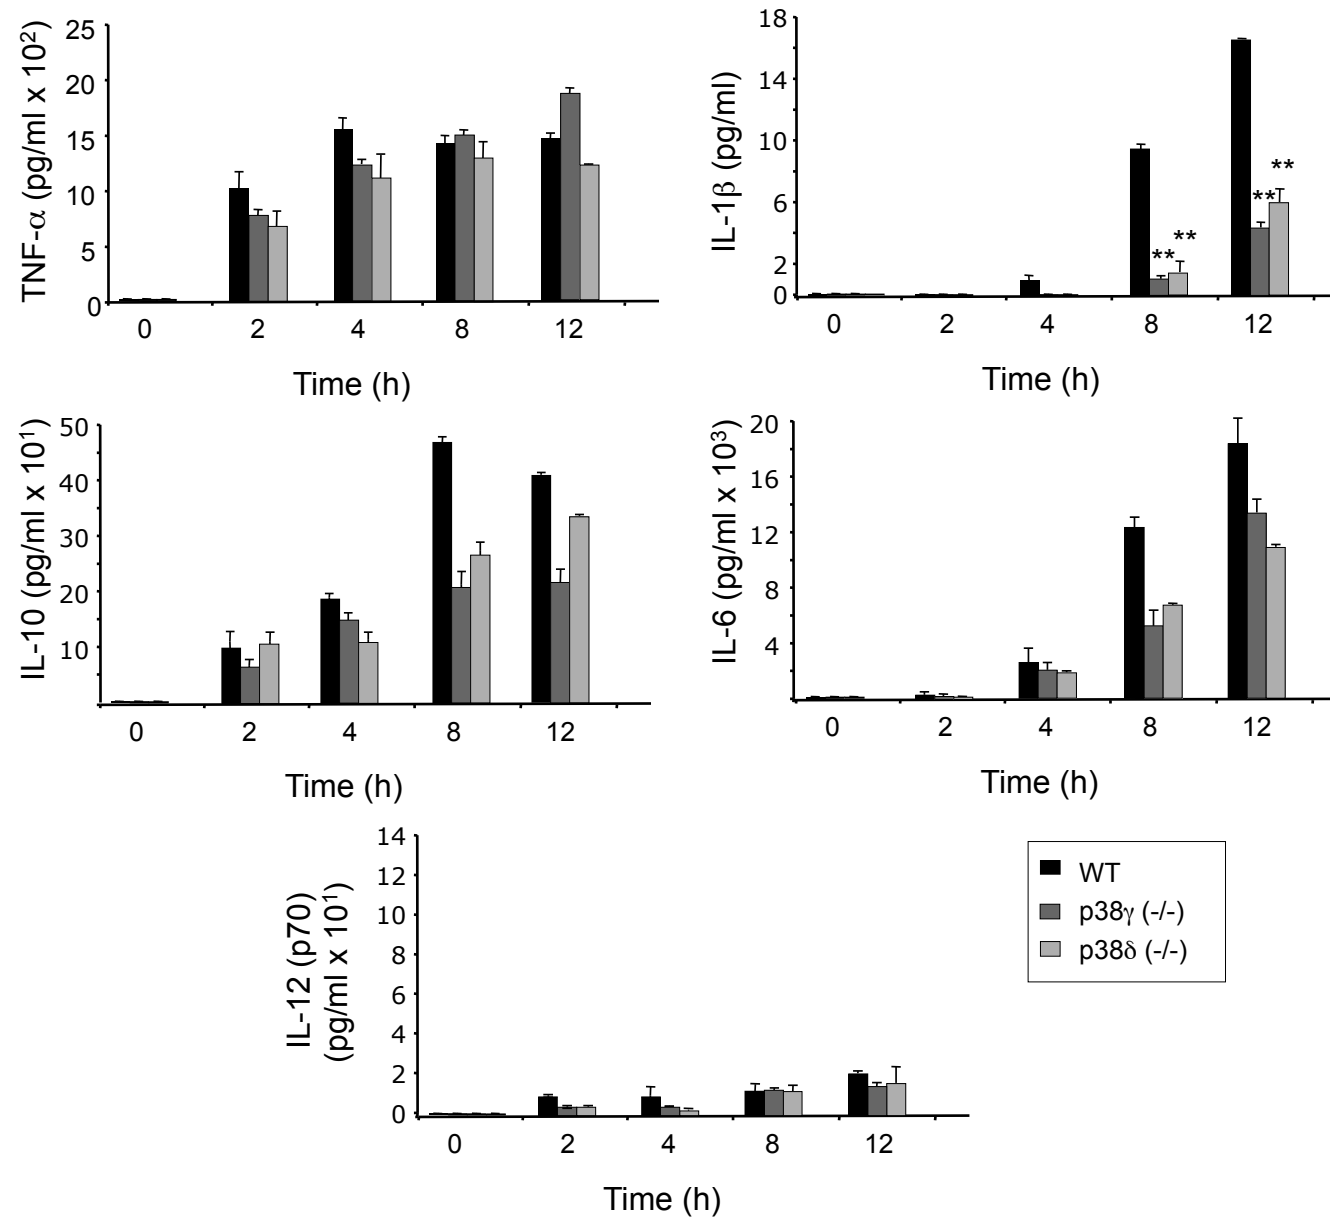

Figure S3 (Risco et al)

**B**

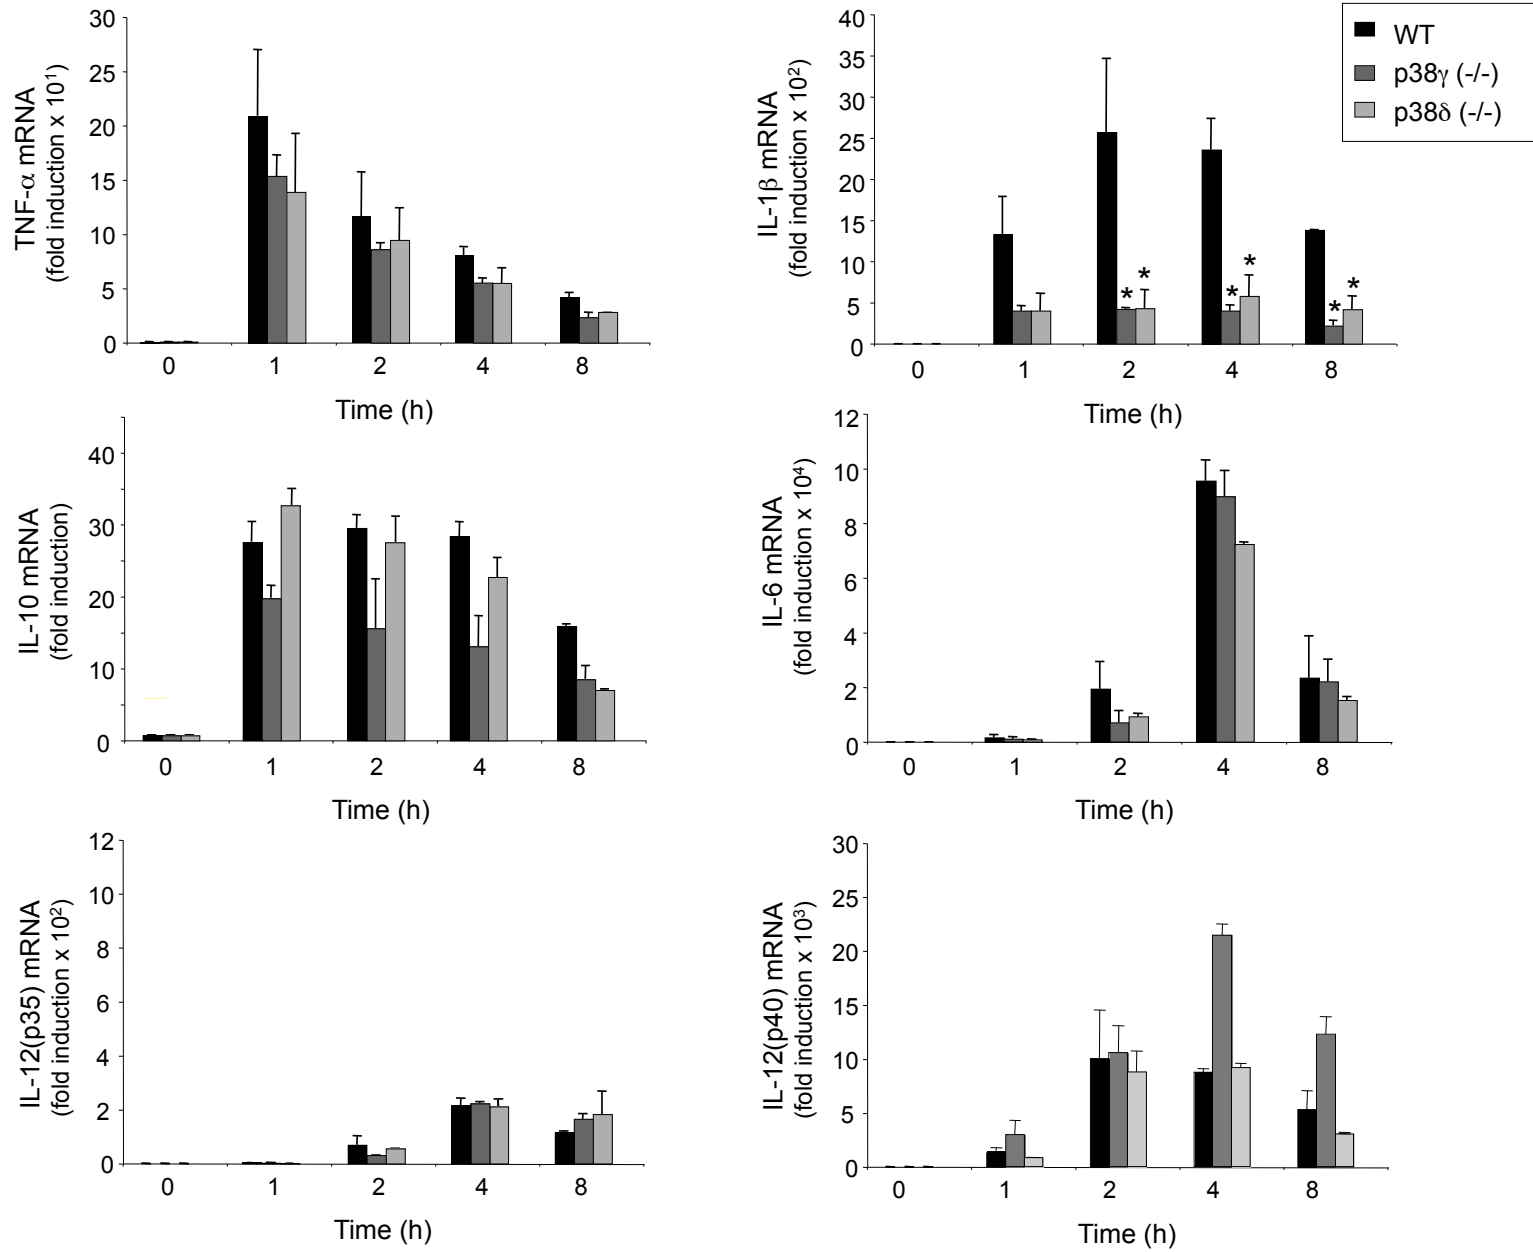

Figure S4 (Risco et al)

A

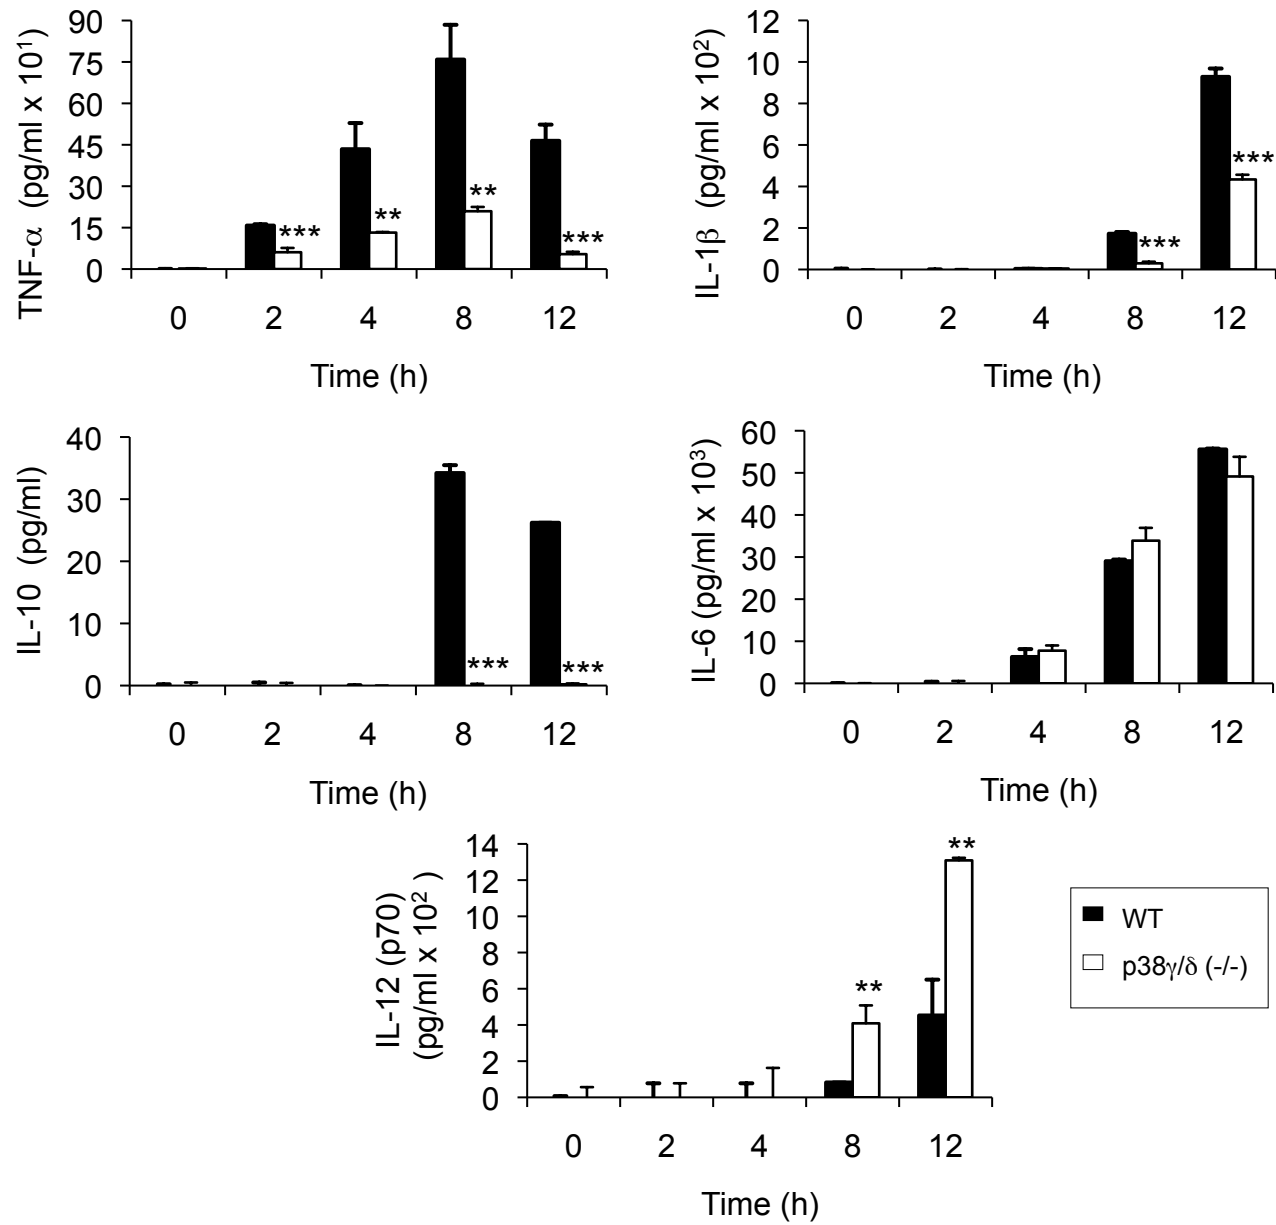

Figure S4 (Risco et al)

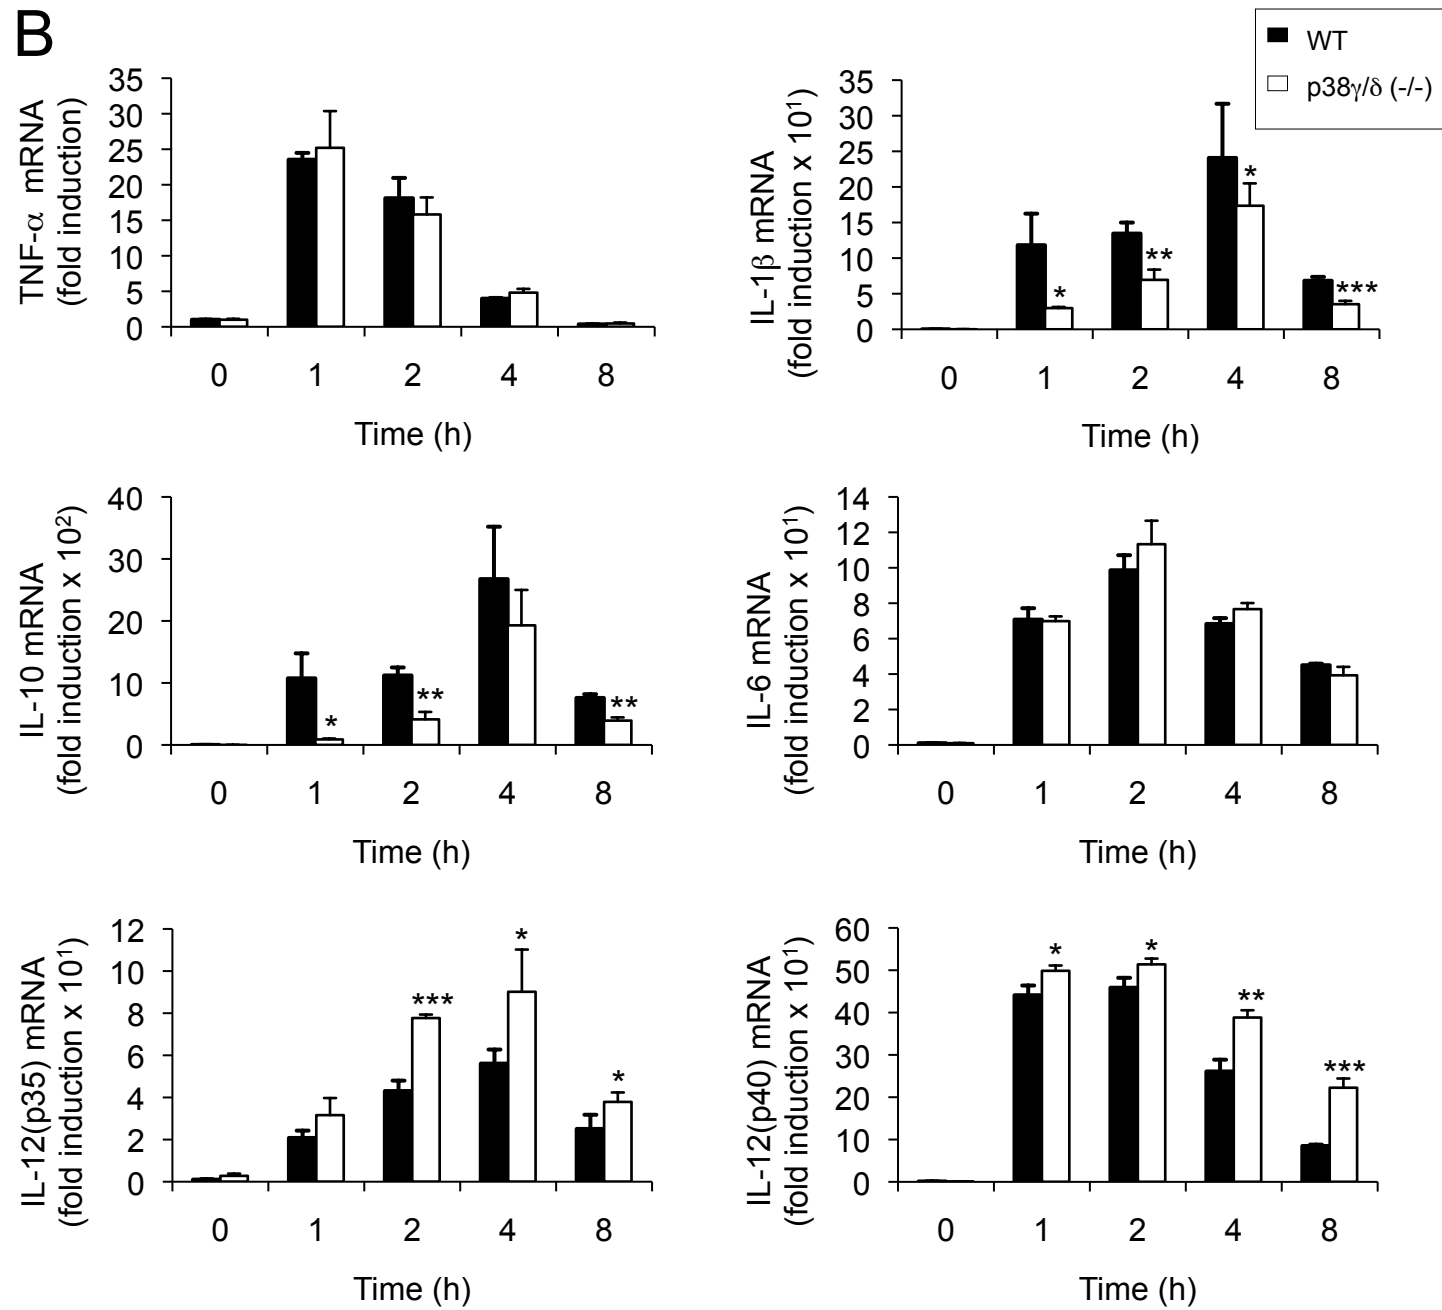



Figure S5 (Risco et al)

**A**

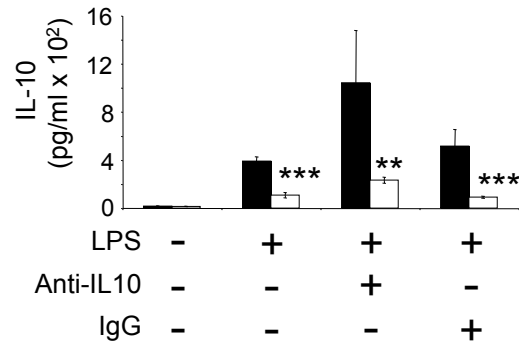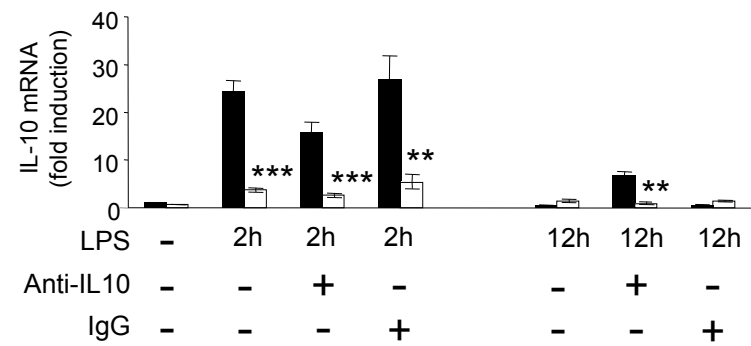

**B**

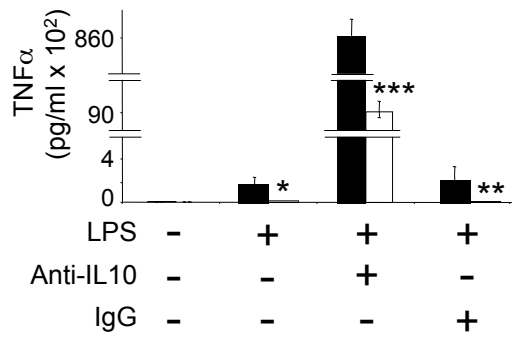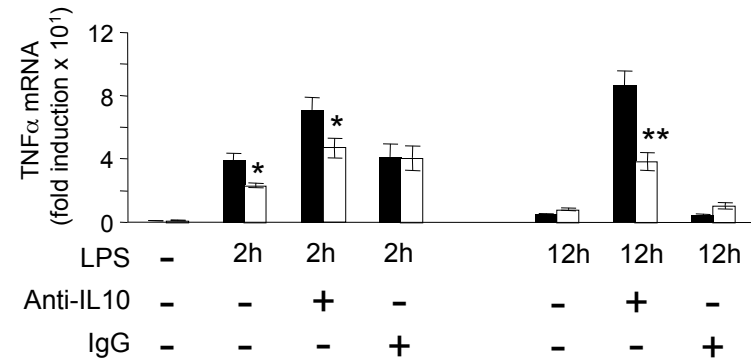



Figure S7 (Risco et al)

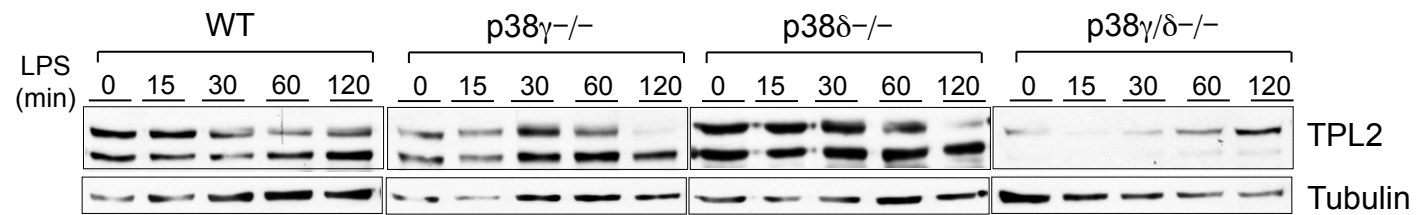

Figure S8 (Risco et al)

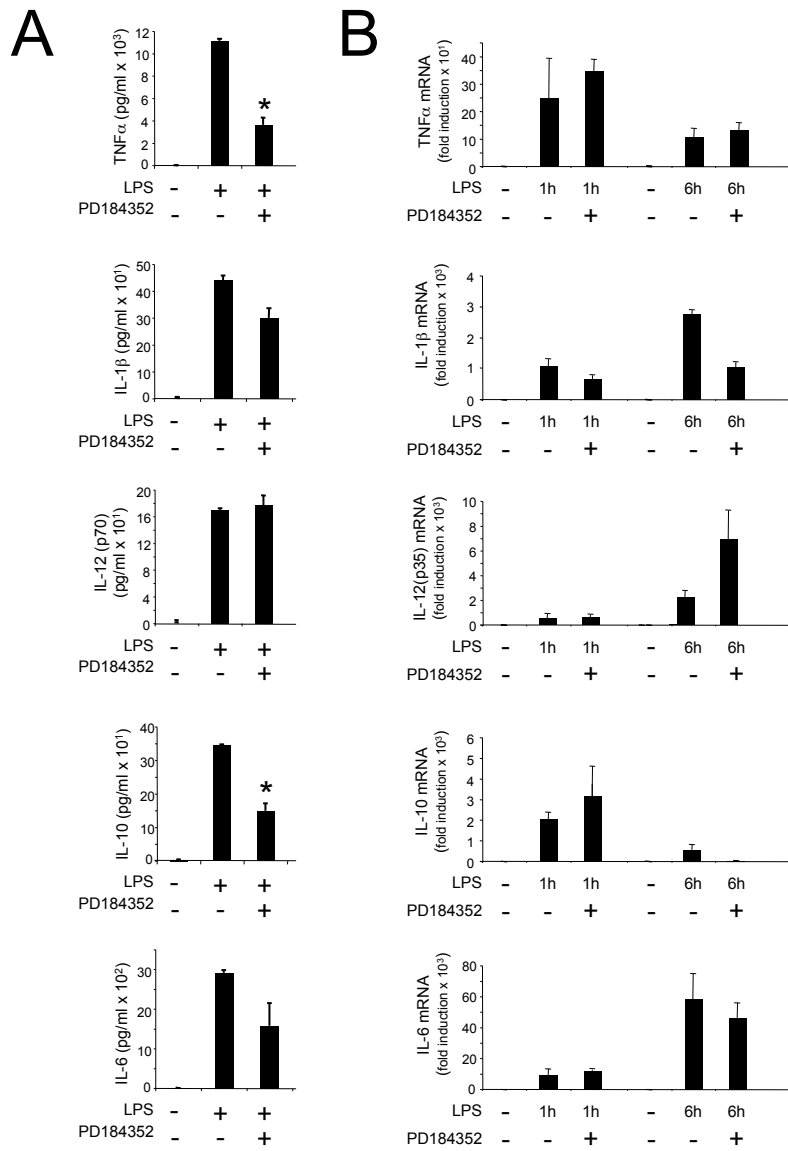

**Figure S9 (Risco et al)**

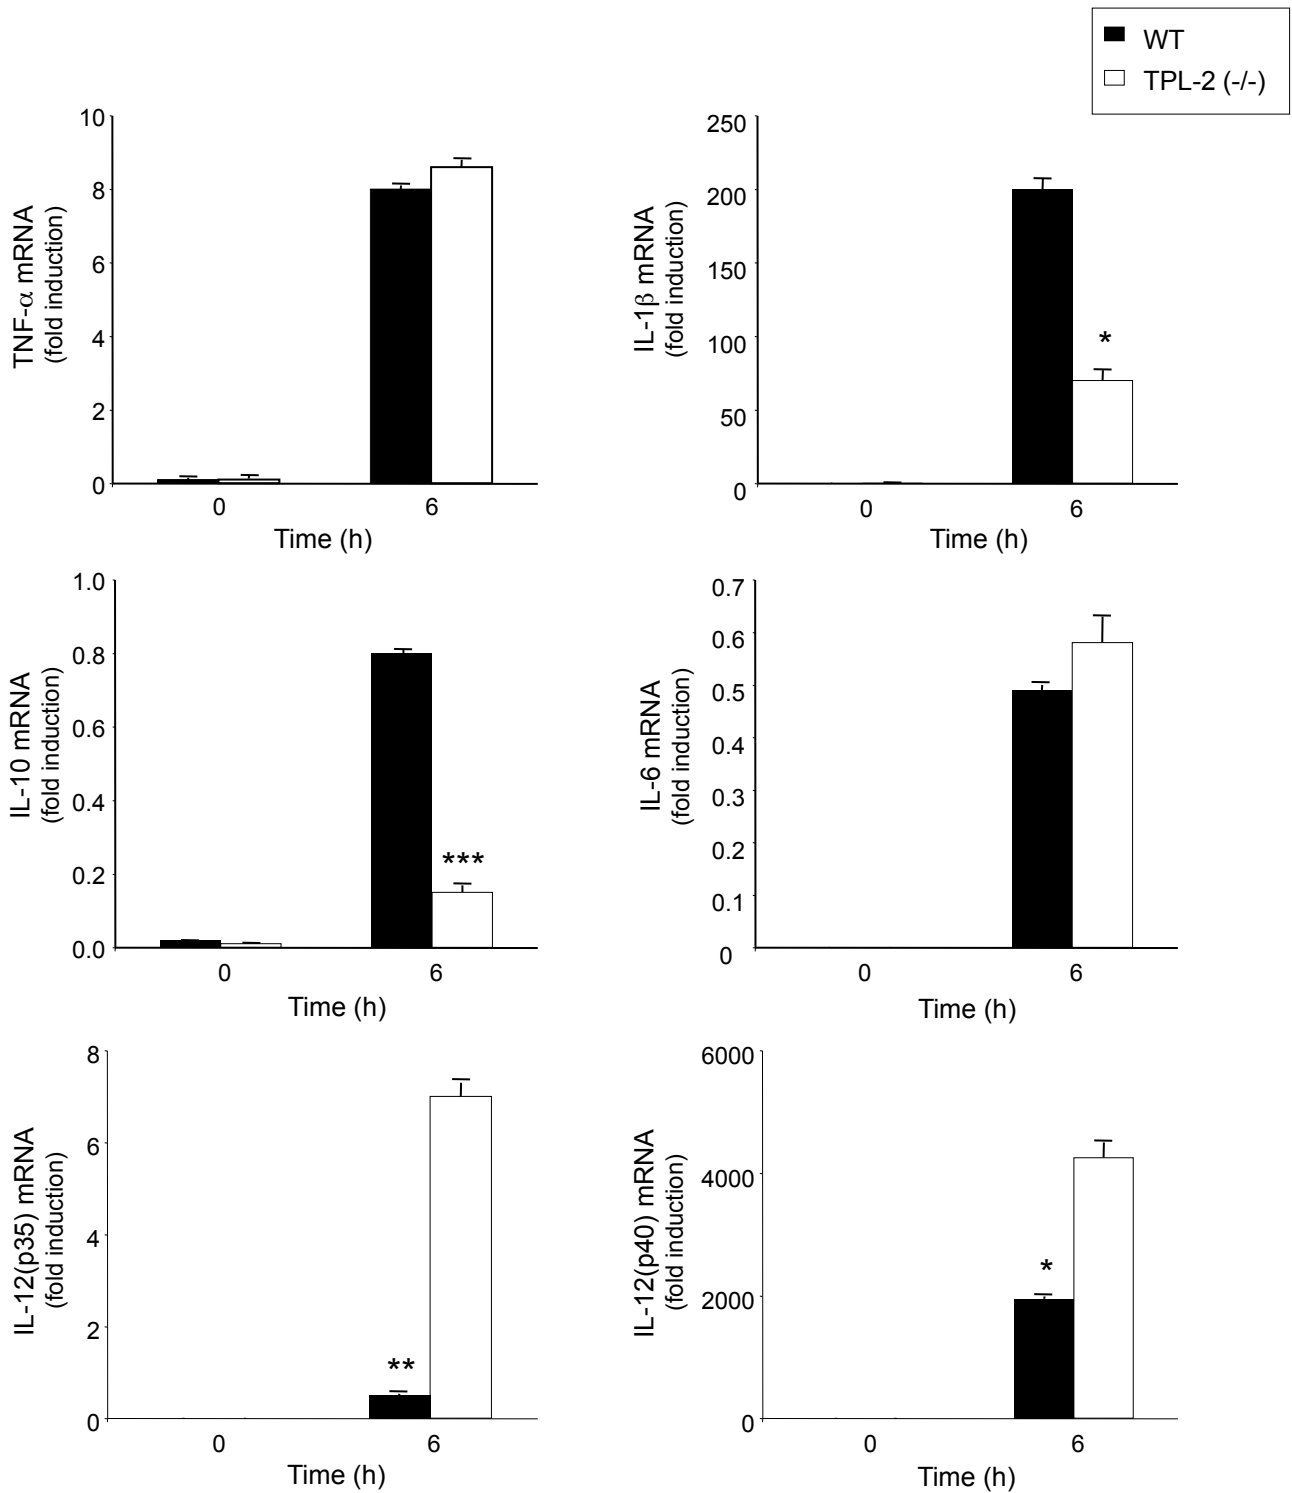

Figure S10 (Risco et al)

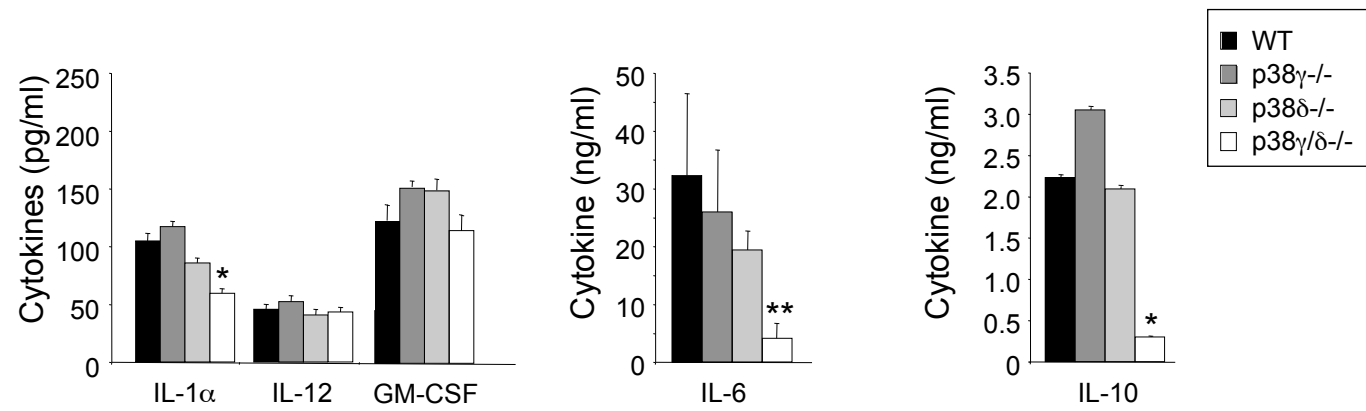

Supplement: 1207290109_sapp.pdf [file 1207290109_sapp.pdf]
